# Supplementary figures and images for: Mapping Remote Roads Using Artificial Intelligence and Satellite Imagery
Source: MDPI journal article supplement (doi:10.3390/rs16050839), 2024-02-28

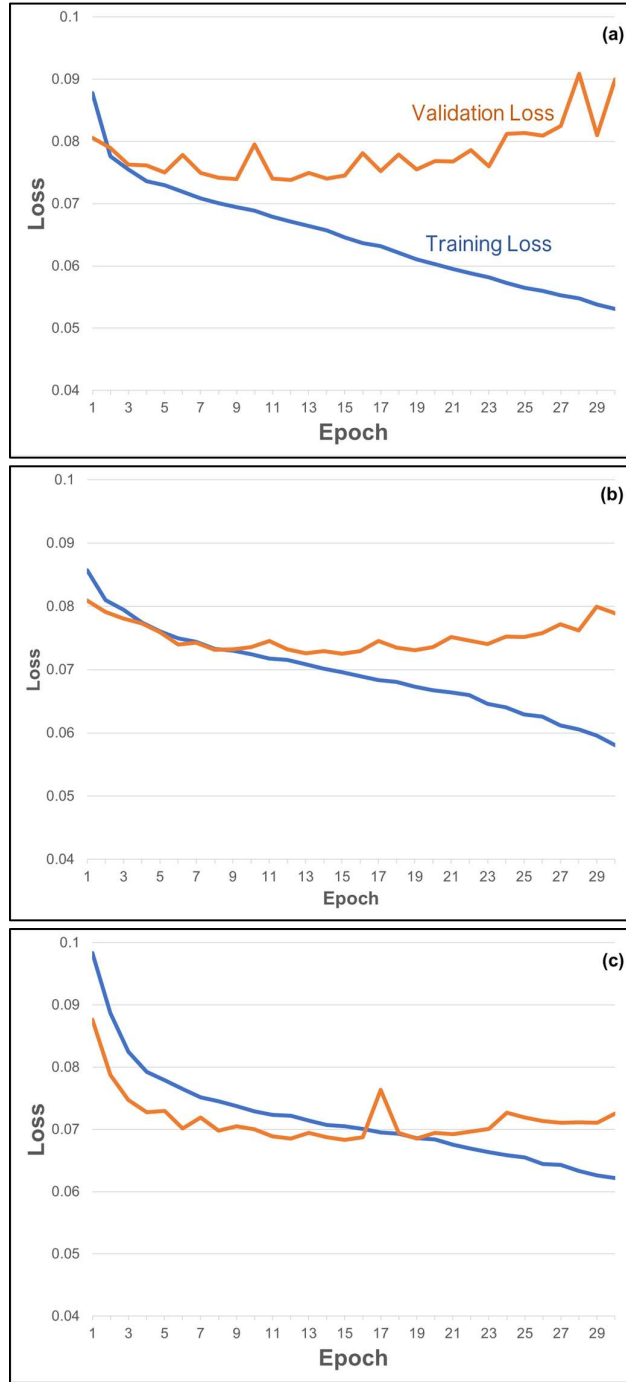

**Figure S1.** Training and validation loss for (a) UNet, (b) ResNet-34, and (c) ResNet-34+ models over 30 epochs.

Supplement: s1 [file s1]
